# Supplementary material
Source: Springer Nature journal article supplement (https://www.springermedizin.de/resource/supplementary/12913_2014_3541_MOESM7_ESM.pdf/9533148)
Supplement: MOESM7 [file 9533148]

**Additional File 7: Methods of Non-Physician Assisted Suicide**

(Only if passed away through Non-PAS, N = 76)

|                                               | Frequency | Percentage |
|-----------------------------------------------|-----------|------------|
| Lethal medication                             | 68        | 89         |
| Voluntary refusal of food and fluid           | 4         | 5          |
| Oxygen deprivation by inhalation of inert gas | 4         | 5          |
| Total N                                       | 76        | 100        |
